# Supplementary material
Source: publisher figshare collection journal article supplement (https://acs.figshare.com/ndownloader/files/4081102)
Supplement: Supplementary file 1 [file 4081102]

# Anthranilamides as Bioinspired Molecular Electrets: Experimental Evidence for Permanent Ground-State Electric Dipole Moment (Supporting Information)

Bing Xia,<sup>a,#</sup> Duoduo Bao,<sup>b</sup> Srigokul Upadhyayula,<sup>b,c</sup> Guilford Jones, II,<sup>a</sup> Valentine I. Vullev<sup>b,c,d,\*</sup>

<sup>a</sup> Department of Chemistry and Photonics Center, Boston University, Boston, MA 02215. <sup>b</sup> Department of Bioengineering, University of California, Riverside, CA 92521. <sup>c</sup> Department of Biochemistry, University of California, Riverside, CA 92521. <sup>d</sup> Department of Chemistry, University of California, Riverside, CA 92521.

Present address:

<sup>#</sup> GlaxoSmithKline, (MDR-Boston), 830 Winter St., Waltham, MA 02451.

1D <sup>1</sup>H-decoupled <sup>13</sup>C NMR spectra of the anthranilamides:

Table of Contents:

|                                                        |    |
|--------------------------------------------------------|----|
| Figure S1 <sup>13</sup> C NMR spectra of h-A-ph.....   | S2 |
| Figure S2 <sup>13</sup> C NMR spectra of h-AA-ph.....  | S3 |
| Figure S3 <sup>13</sup> C NMR spectra of h-AAA-ph..... | S4 |

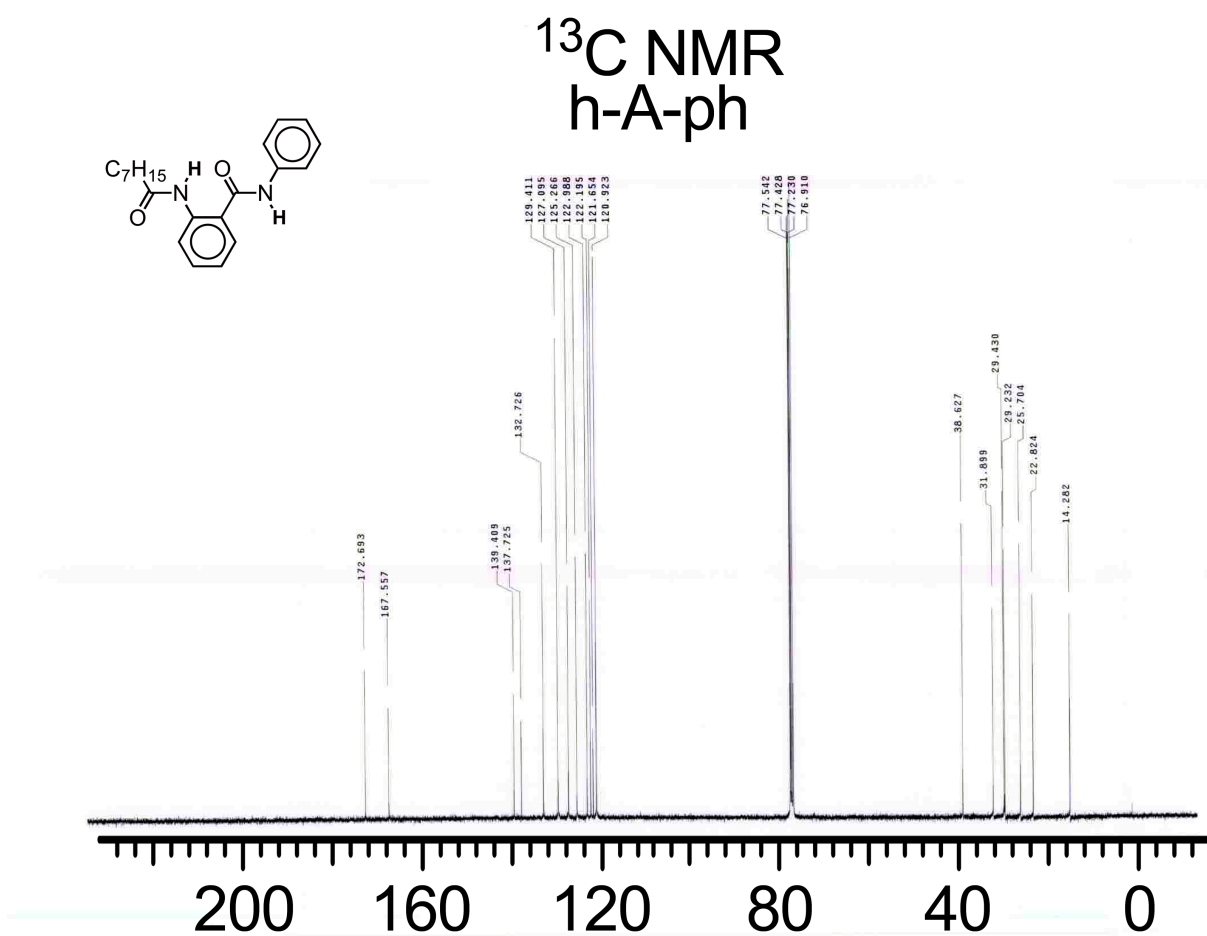

**Figure S1.** <sup>13</sup>C NMR spectra of oligoanthranilamide monomer – h-A-ph

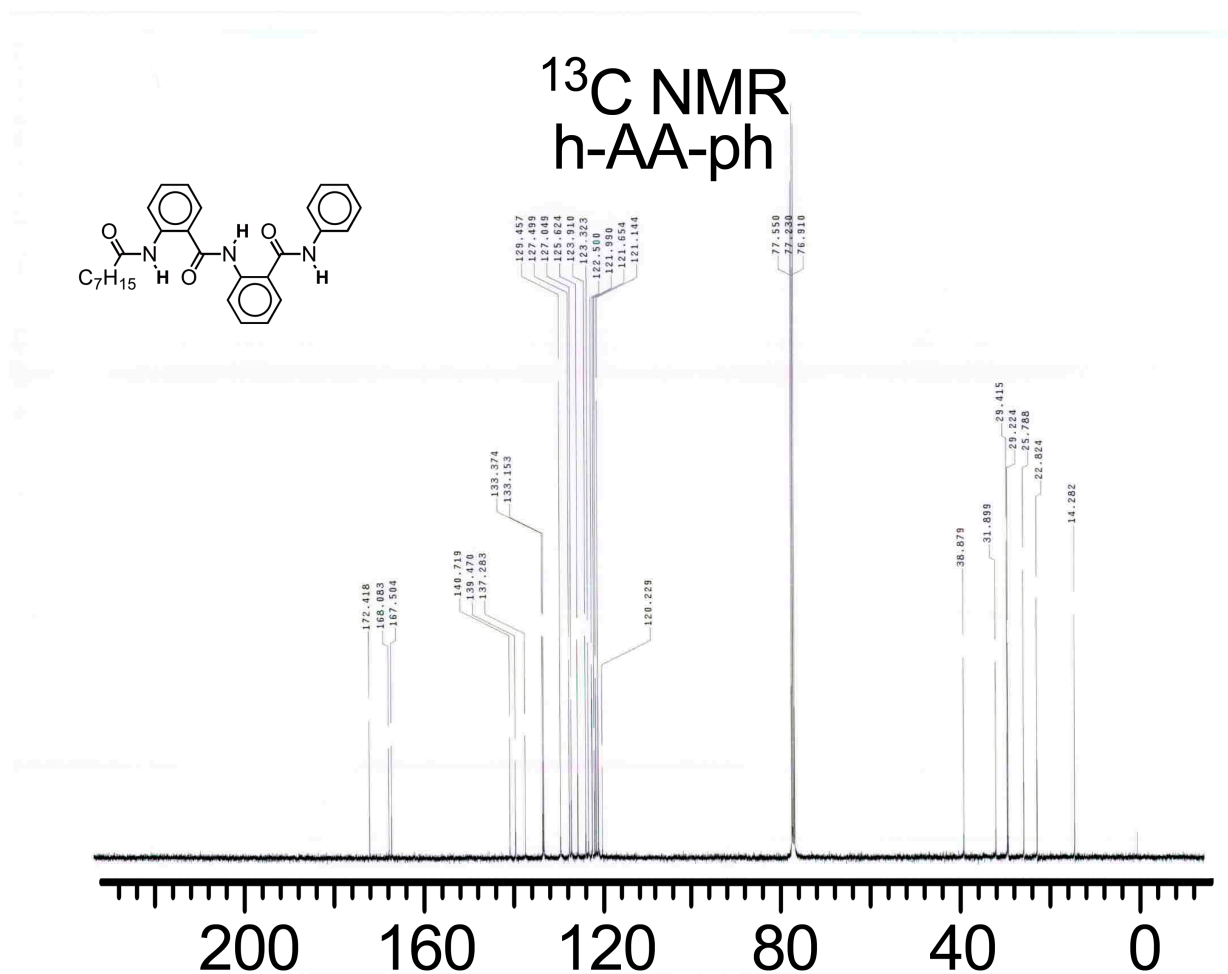

**Figure S2.** <sup>13</sup>C NMR spectra of oligoanthranilamide dimer – h-AA-ph

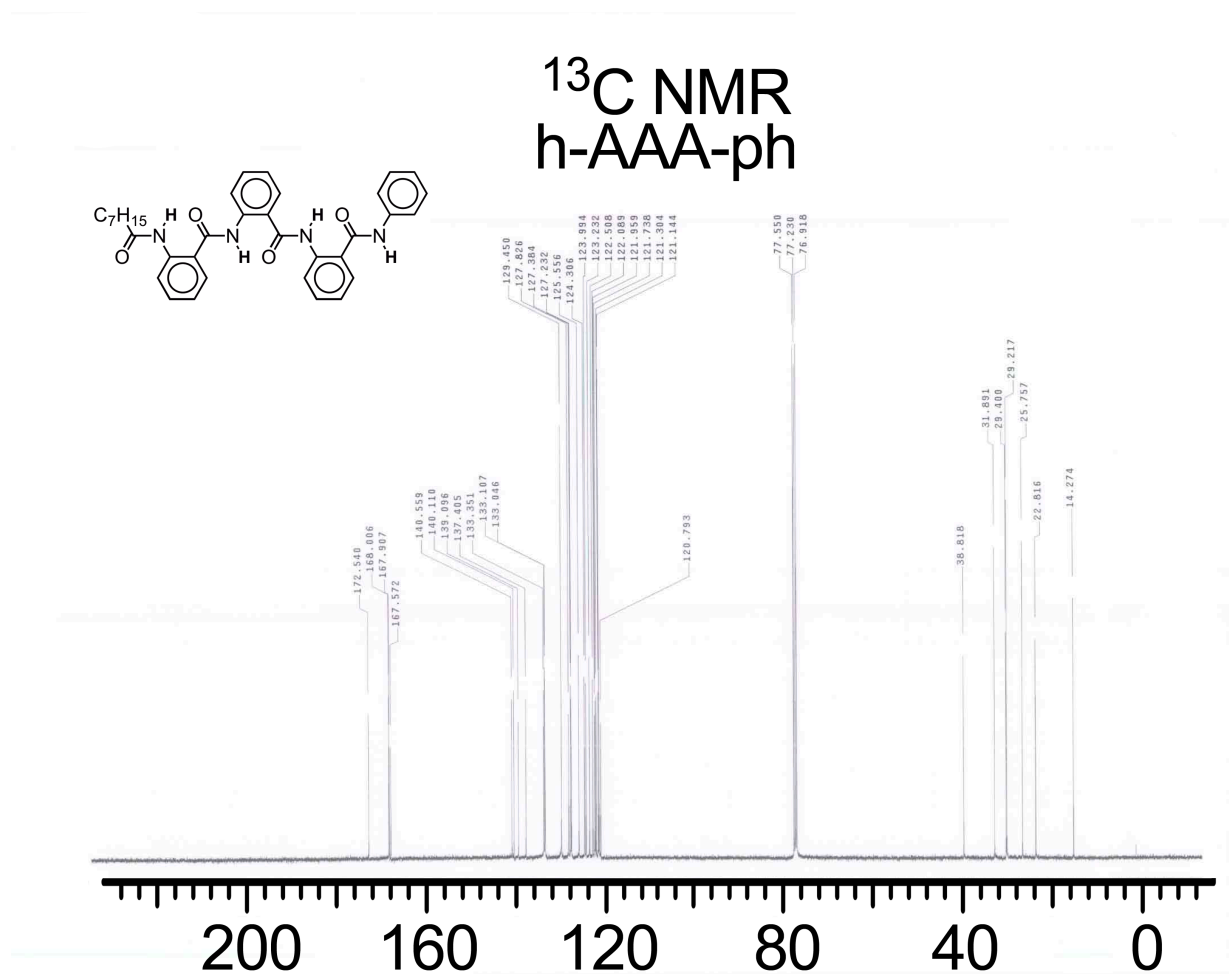

**Figure S3.** <sup>13</sup>C NMR spectra of oligoanthranilamide trimer – h-AAA-ph
